# Supplementary material for: Synthetic lethality for linking the mycophenolate mofetil mode of action with molecular disease and drug profiles
Source: Royal Society of Chemistry journal article supplement (doi:10.1039/c2mb25256b), 2012-09-06
Supplement: c2mb25256b.pdf [file c2mb25256b.pdf]

## Supplementary table S2

Selected clinical trials showing association of MMF with diseases suggested to be associated with MMF molecular footprint by synlet enrichment between or within pathways. Only the drug association determined by synlet associated pathways is indicated, even if multiple drugs are used in a trial (as is often the case). Importantly, few trials were designed to differentiate MMF use from other drug combinations, yet apply MMF as part of basic treatment or within a list of potential treatment options.

| Indication                                                      | Paired Drug          | Trial       | Phase  | Aim                                                             | Status     | Outcome       |
|-----------------------------------------------------------------|----------------------|-------------|--------|-----------------------------------------------------------------|------------|---------------|
| Atherosclerosis in SLE patients                                 | -                    | NCT01101802 | IV     | MMF Efficacy                                                    | Completed  | Not specified |
| Lupus Nephritis                                                 | -                    | NCT00377637 | III    | Superiority to Azathioprine (standard of care)                  | Completed  | Superior      |
| SLE with extra-renal Manifestation                              | -                    | NCT01112215 | IV     | Superiority to Azathioprine (standard of care)                  | Recruiting | -             |
| Multiple Sclerosis                                              | Interferon-beta-1a   | NCT00618527 | 0      | Prolonging the efficacy of interferon                           | Ongoing    | -             |
|                                                                 |                      | NCT00324506 | II     | Safety and tolerability                                         | Unknown    | -             |
|                                                                 |                      | NCT00223301 | II/III | Improvement of patient condition                                | Completed  | Unknown       |
| Anti-neutrophil cytoplasm antibody (ANCA) associated vasculitis | Infliximab           | NCT00753103 | II     | Superiority of Infliximab over standard immunosuppression alone | Completed  | Unknown       |
| Blood stem-cell transplantation in Chronic Myelogenous Leukemia | Interferon-alpha     | NCT00110058 | II     | Fludarabine together with radiation + immunosuppression         | Completed  | Unknown       |
| Lymphoblastic Leukemia and Chronic Myelogenous Leukemia         | Dasatinib, Nilotinib | NCT00036738 | II     | Better tradeoff between graft vs. tumor and graft vs. host      | Recruiting | -             |

|                                    |            |             |        |                                                                                   |                                               |   |
|------------------------------------|------------|-------------|--------|-----------------------------------------------------------------------------------|-----------------------------------------------|---|
| Kidney Transplantation             | Efalizumab | NCT00729768 | II/III | Efalizumab versus Cyclosporine (in both cases MMF)                                | Withdrawn prior to enrollment                 | - |
| Kidney Transplantation             | Efalizumab | NCT00472082 | I/II   | Replacement of Tacrolimus by Efalizumab                                           | Terminated (request of the drug manufacturer) | - |
| Lupus Nephritis                    | Etanercept | NCT00447265 | II     | Improvement of addition to standard care (including MMF) over standard care alone | Terminated                                    | - |
| Autoimmune diseases like arthritis | Efalizumab | NCT00777400 | I/II   | Superiority of Efalizumab + Sirolimus vs. Tacrolimus + MMF (Treg maximization)    | Terminated (safety & trial feasibility)       | - |
| Graft Versus Host Disease          | Etanercept | NCT00639717 | II     | More effective prophylaxis                                                        | Recruiting                                    | - |
| Type 1 Diabetes                    | Anakinra   | NCT01346085 | I/II   | Calcineurin Inhibitor (CNI)-Free Immunosuppression                                | Ongoing                                       | - |

### Supplementary table S3

This table summarizes discussed application potentials for MMF based on pathway analysis, explicit synlet network and existing clinical use. This list does not present all possibly synergistic drug combinations, only those for which certain experimental or clinical evidence exists or where extension of existing practice seems to be particularly interesting. Also, this compilation is not a complete representation of current MMF applications, particularly as it has been used in allograft transplantation and numerous auto-immune disorders to some degree.

Legend for Rationale to support a drug/disease MMF association:

- (1) Molecular footprint
- (2) SYNLET pathway enrichment (including diseases clearly implicated by a pathway)
- (3) explicit SYNLET network

| Proposed Indication                                                                  | Rationale | Suggested relationship        | Combined synlet Drugs                               | Most advanced level of development         |
|--------------------------------------------------------------------------------------|-----------|-------------------------------|-----------------------------------------------------|--------------------------------------------|
| Well established applications and advanced trials                                    |           |                               |                                                     |                                            |
| Allograft rejection                                                                  | 1 / 2 / 3 | Inhibition                    | + Pentostatin<br>+ Tacrolimus<br>+ Sirolimus        | Standard of care                           |
| SLE                                                                                  | 1 / 2     | Inhibition                    | -                                                   | Standard of care                           |
| Multiple Sclerosis                                                                   | 2         | Inhibition                    | Monotherapy                                         | Beneficial in small-scale clinical studies |
|                                                                                      |           |                               | + Interferon-beta-1a                                | Phase II/III study; unclear status         |
| Vasculitis                                                                           | 2         | Inhibition                    | + Infliximab                                        | Phase II study; unclear status             |
| Chagas disease                                                                       | 2         | Amelioration or Exacerbation? | + Pentostatin<br>+ Tacrolimus<br>+ Sirolimus        | In use for heart transplantation           |
| Relationships which experimental/clinical basis but which need further investigation |           |                               |                                                     |                                            |
| Inflammatory bowel diseases                                                          | 3         | Inhibition                    | Monotherapy                                         | Early clinical success                     |
|                                                                                      |           |                               | + Sulfasalazine                                     | Synergy ?                                  |
| Rheumatoid Arthritis                                                                 |           |                               | Monotherapy                                         | In use                                     |
|                                                                                      |           |                               | + Sulfasalazine                                     | Synergy ?                                  |
| Asthma                                                                               | 1 / 3     | Inhibition                    | Monotherapy                                         | Early clinical success                     |
|                                                                                      |           |                               | + Theophylline                                      | Synergy ?                                  |
| Atherosclerosis                                                                      | 3         | Inhibition                    | Monotherapy                                         | Beneficial effect in murine model          |
|                                                                                      |           |                               | Combination with drugs from the six approved groups | hypothetical                               |
| ventricular hypertrophy / ventricular diastolic                                      | 3         | Reversal ?                    | + Sirolimus                                         | Clinically beneficial; Synergy ?           |

|                                                                                                             |   |                               |                                                                           |                                 |
|-------------------------------------------------------------------------------------------------------------|---|-------------------------------|---------------------------------------------------------------------------|---------------------------------|
| dysfunction                                                                                                 |   |                               |                                                                           |                                 |
| Type I diabetes mellitus                                                                                    | 1 | Inhibition                    | Monotherapy                                                               | Lack of effect                  |
|                                                                                                             |   |                               | + Anakinra                                                                | Phase I/II completed; Synergy ? |
| <i>Potentially interesting applications/dependencies without or including only sparse experimental data</i> |   |                               |                                                                           |                                 |
| HTLV-I-infection                                                                                            | 2 | Amelioration or Exacerbation? | + Tofacitinib                                                             | hypothetical                    |
| Amyotrophic lateral sclerosis (ALS)                                                                         | 2 | Inhibition                    | -                                                                         | hypothetical                    |
| Autoimmune thyroid disease                                                                                  | 1 | Inhibition                    | -                                                                         | ?                               |
| Viral myocarditis                                                                                           | 1 | Amelioration or Exacerbation? | -                                                                         | hypothetical                    |
| Colorectal cancer                                                                                           | 2 | Inhibition                    | -                                                                         | In-vitro ?                      |
| Acute myeloid leukemia                                                                                      | 2 | Inhibition                    | Monotherapy                                                               | In-vitro ?                      |
|                                                                                                             |   |                               | + Infliximab                                                              | hypothetical                    |
| Chronic myeloid leukemia                                                                                    | 2 | Inhibition                    | -                                                                         | In-vitro ?                      |
|                                                                                                             |   |                               | + Infliximab                                                              | hypothetical                    |
| Pancreatic cancer                                                                                           | 2 | Inhibition                    | -                                                                         | In-vitro ?                      |
| Renal cell carcinoma                                                                                        | 2 | Inhibition                    | -                                                                         | In-vitro ?                      |
| Prostate cancer                                                                                             | 2 | Inhibition                    | -                                                                         | In-vitro ?                      |
| Small cell lung cancer                                                                                      | 2 | Inhibition                    | -                                                                         | hypothetical                    |
| ErbB-1/EGFR positive cancers                                                                                | 2 | Inhibition                    | + Nilotinib<br>+ Sorafenib<br>+ Gefitinib<br>+ Panitumumab<br>+ Cetuximab | hypothetical                    |
| Surgery (+/- Cushing's syndrome)                                                                            | 3 | Side-effects; dosage          | + Flurane anesthetics                                                     | hypothetical                    |

### **Supplementary table S4**

Potential effects of drug combinations suggested by the MMF synlet graph with or without addition of MMF. This table summarizes a number of potential interactions pointed out in the manuscript although searching for MMF independent interactions and effects of alleles was not focus of the study.

| <b>Indication</b>                                | <b>Drug combination</b>                                             | <b>Proposed Effect</b>                                                                                                                                       |
|--------------------------------------------------|---------------------------------------------------------------------|--------------------------------------------------------------------------------------------------------------------------------------------------------------|
| Antineoplastic activity                          | Alendronate / MMF                                                   | Antagonism                                                                                                                                                   |
| Osteoporosis, Paget's disease, Cushing's disease | Bisphosphonate drugs and Metirapone or Mitotane with or without MMF | Synergism                                                                                                                                                    |
| Surgery / hypertension in Cushing's syndrome     | Bisphosphonate drugs and Flurane anesthetics with or without MMF    | Synergism ?                                                                                                                                                  |
| Studies involving MMF                            | SDHA inhibitors or natural variants such as SNPs                    | Synergism/Antagonism?; Side-effects; Clinically beneficial effect on natural SDHA variants and associated diseases such as cardiomyopathy and paraganglioma. |
